# Supplementary material
Source: PubMed Central journal article supplement (PMC6399016)
Supplement: NIHMS1005956-supplement-Appendix_Table_1_and_2.pdf [file NIHMS1005956-supplement-Appendix_Table_1_and_2.pdf]

**Appendix**  
**Yoga for Military Veterans with Chronic Low Back Pain: A Randomized Clinical Trial**  
**Groessler et al.**

**Appendix Table 1.** Self-reported Use of Narcotic Pain Medication, Other Medical Pain Treatments, and Self-help Pain Treatments

| Variable                                 | Baseline,<br>% | 6 weeks,<br>% | <i>p</i> -<br>value | 12 weeks,<br>% | <i>p</i> -<br>value | 6 months,<br>% | <i>p</i> -value  |
|------------------------------------------|----------------|---------------|---------------------|----------------|---------------------|----------------|------------------|
| <b>Narcotic pain medication</b>          |                |               |                     |                |                     |                |                  |
| Yoga (n=75)                              | 19             | 11            |                     | 12             |                     | 9              |                  |
| Usual care (n=75)                        | 21             | 12            |                     | 11             |                     | 7              |                  |
| Total sample (n=150)                     | 20             | 11            | <b>0.007</b>        | 11             | <b>0.007</b>        | 8              | <b>&lt;0.001</b> |
| Between group difference                 |                |               | 0.945               |                | 0.576               |                | 0.395            |
| <b>Other medical treatments for pain</b> |                |               |                     |                |                     |                |                  |
| Yoga                                     | 56             | 44            |                     | 44             |                     | 39             |                  |
| Usual care                               | 47             | 44            |                     | 47             |                     | 37             |                  |
| Total sample (n=150)                     | 51             | 44            | 0.070               | 45             | 0.137               | 38             | <b>0.001</b>     |
| Between group difference                 |                |               | 0.284               |                | 0.157               |                | 0.415            |
| <b>Self-help pain treatments</b>         |                |               |                     |                |                     |                |                  |
| Yoga                                     | 76             | 71            |                     | 71             |                     | 68             |                  |
| Usual care                               | 72             | 75            |                     | 69             |                     | 60             |                  |
| Total sample (n=150)                     | 74             | 73            | 0.744               | 70             | 0.334               | 64             | <b>0.020</b>     |
| Between group difference                 |                |               | 0.396               |                | 0.766               |                | 0.767            |

*Note:* Boldface indicates statistical significance ( $p < 0.05$ ).

**Appendix**  
**Yoga for Military Veterans with Chronic Low Back Pain: A Randomized Clinical Trial**  
**Groessler et al.**

**Appendix Table 2.** Participant Characteristics in Large Clinical Trials of Yoga for Chronic Low Back Pain

| Variable                        | Sherman (2011)<br>(n=228) | Tilbrook (2011)<br>(n=313) | Current study<br>(n=150) |
|---------------------------------|---------------------------|----------------------------|--------------------------|
| Age, years                      | 48.4                      | 46.3                       | 53.4                     |
| Women, %                        | 64                        | 70                         | 26                       |
| Non-white race, %               | 13                        | not reported               | 51                       |
| College graduates, %            | 62                        | 58                         | 54                       |
| Unemployed or disabled, %       | 13                        | 11                         | 32                       |
| Homeless (last 5 years), %      | not reported              | not reported               | 18                       |
| Years of chronic low back pain  | 10.8                      | 10.0                       | 15.0                     |
| RMDQ baseline                   | 9.1                       | 7.8                        | 9.9                      |
| Narcotic medications, %         | 7                         | not reported               | 20                       |
| Attended 50% of yoga classes, % | 65                        | 60                         | 53                       |
| Attended $\geq 1$ yoga class, % | 95                        | 85                         | 91                       |

RMDQ, Roland Morris Disability Questionnaire (scale 0–24)
